# Supplementary material for: Climate projections over the Great Lakes Region: using two-way coupling of a regional climate model with a 3-D lake model
Source: Copernicus journal article supplement (doi:10.5194/gmd-15-4425-2022), 2022-06-09
Supplement: Supplementary file 1 [file gmd-15-4425-2022-supplement.pdf]

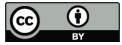

*Supplement of*

## **Climate projections over the Great Lakes Region: using two-way coupling of a regional climate model with a 3-D lake model**

**Pengfei Xue et al.**

*Correspondence to:* Pengfei Xue (pexue@mtu.edu)

The copyright of individual parts of the supplement might differ from the article licence.

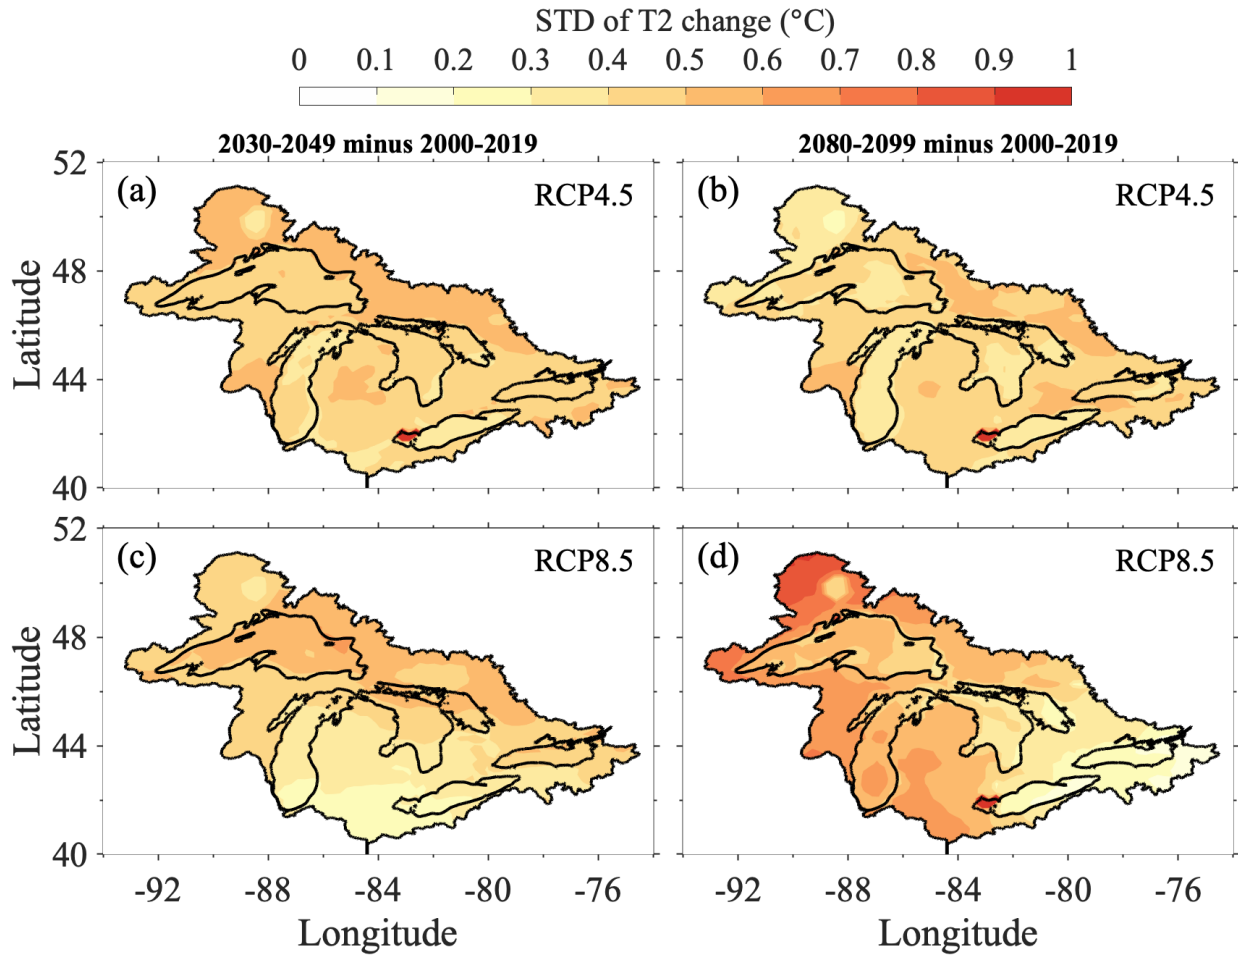

Fig. S1: Standard deviation of the projected ensemble changes in the annual mean surface air temperature over the Great Lakes basin during the mid-century (2030-2049) and late century (2080-2099) for the RCP 4.5 and RCP 8.5 scenarios, relative to the present-day climate (2000-2019).

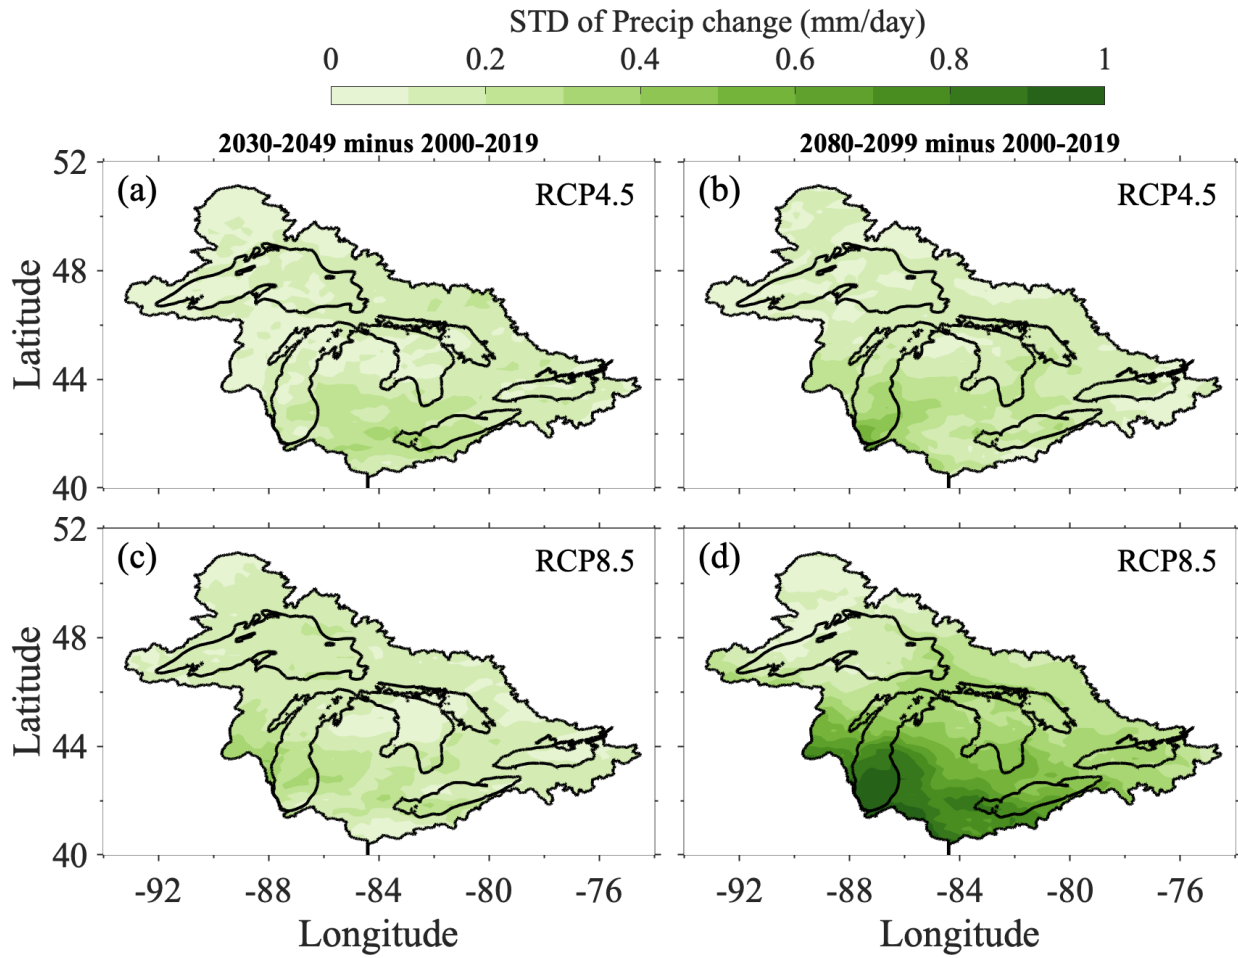

Fig. S2: Standard deviation of the projected ensemble changes in the annual mean precipitation over the Great Lakes basin during the mid-century (2030-2049) and late century (2080-2099) for the RCP 4.5 and RCP 8.5 scenarios, relative to the present-day climate (2000-2019).
